# Supplementary material for: Hyperlocal Air Pollution Mapping: A Scalable Transfer Learning LUR Approach for Mobile Monitoring
Source: PubMed Central journal article supplement (PMC11325550; doi:10.1021/acs.est.4c06144), 2024-07-31
Supplement: es4c06144_si_001.pdf [file es4c06144_si_001.pdf]

1 **Supplementary Information for:**

2 **Hyperlocal Air Pollution Mapping: A Scalable Transfer Learning LUR**

3 **Approach for Mobile Monitoring**

4 *Zhendong Yuan*<sup>1\*</sup>, *Jules Kerckhoffs*<sup>1</sup>, *Hao Li*<sup>2</sup>, *Jibrán Khan*<sup>3,4</sup>, *Gerard Hoek*<sup>1</sup>, *Roel Vermeulen*<sup>1,5</sup>

5 <sup>1</sup>Institute for Risk Assessment Sciences, Utrecht University, 3584 CM Utrecht, Netherlands

6 <sup>2</sup>Professorship of Big Geospatial Data Management, Technical University of Munich, 85521 Ottobrunn, Germany

7 <sup>3</sup>Department of Environmental Science, Aarhus University, DK-4000 Roskilde, Denmark

8 <sup>4</sup>Danish Big Data Centre for Environment and Health (BERTHA), Aarhus University, DK-4000 Roskilde, Denmark

9 <sup>5</sup>Julius Centre for Health Sciences and Primary Care, University Medical Centre, Utrecht University, 3584 CX Utrecht,

10 The Netherlands

11  
12 \*Corresponding author

13 *z.yuan@uu.nl*

14  
15  
16  
17  
18 **This file contains one text, five tables and three figures.**

19 **Text:**

20 **Text S1. Model implementation of SLR**

21 **Tables:**

22 **Table S1. Spatial predictor variables with units, predefined directions of effect, and buffer sizes**

23 **in AMS.**

24 **Table S2. Statistics of UFP model predictions in particle/cm<sup>3</sup>.**

25 **Table S3. SLR trained in Rotterdam.**

26 **Table S4. SLR trained in Copenhagen.**

27 **Table S5. SLR trained in Amsterdam.**

28  
29 **Figures:**

30 **Figure S1. Scatterplot of model predictions against fixed-site validation measurements.**

31 **Figure S2. NO<sub>2</sub> maps of differences between SLR\_AMS\_160D and the other model tested.**

32 **Figure S3. Spatial maps of UFP predictions from the mixed-effect and IDW\_Coral models with**

33 **a unified legend.**

34

35 **Text S1. Model implementation of SLR**

36 The stepwise linear regression (SLR) model selects predictor variables in a forward stepwise  
 37 manner. It starts by taking an empty, intercept-only model, and then adds variables based on  
 38 the goodness of fit determined via the adjusted R<sup>2</sup> values. The variable having the highest  
 39 adjusted R<sup>2</sup> value was added first in the model, and the model development process stopped  
 40 when adding new variables could not improve the adjusted R<sup>2</sup>. Predictor variables are only  
 41 included when the direction of the association is predetermined (e.g., positive for traffic load).  
 42 The predictor variables in the LUR models were checked for p-value and collinearity. Here, p-  
 43 value > 0.10 and variance inflation factor > 3 and Cook's D <1 was removed.

44

45 **Table S1: Spatial predictor variables with units, predefined directions of effect, and buffer**  
 46 **sizes in AMS.**

| Predictor variable                            | Abbreviation | Units          | Direction of effect | Buffer | 10 <sup>th</sup> percentile | Mean     | 90 <sup>th</sup> Percentile |
|-----------------------------------------------|--------------|----------------|---------------------|--------|-----------------------------|----------|-----------------------------|
| <b>Agricultural land area<sup>1</sup></b>     | AGRI_        | m <sup>2</sup> | -                   | 100    | 0                           | 1159     | 0                           |
|                                               |              |                |                     | 300    | 0                           | 11288    | 0                           |
|                                               |              |                |                     | 500    | 0                           | 34779    | 64052                       |
|                                               |              |                |                     | 1000   | 0                           | 178942   | 649727                      |
|                                               |              |                |                     | 5000   | 1710991                     | 13290916 | 30287613                    |
| <b>Airport area<sup>1</sup></b>               | AIR_         | m <sup>2</sup> | +                   | 5000   | 0                           | 640794   | 1628347                     |
| <b>Industry area<sup>1</sup></b>              | INDUS_       | m <sup>2</sup> | +                   | 100    | 0                           | 2006     | 0                           |
|                                               |              |                |                     | 300    | 0                           | 17769    | 41347                       |
|                                               |              |                |                     | 500    | 0                           | 49074    | 180131                      |
|                                               |              |                |                     | 1000   | 0                           | 199831   | 730248                      |
|                                               |              |                |                     | 5000   | 2902185                     | 5182292  | 8091464                     |
| <b>Natural and forested areas<sup>1</sup></b> | NATUR_       | m <sup>2</sup> | -                   | 100    | 0                           | 0        | 0                           |
|                                               |              |                |                     | 300    | 0                           | 0        | 0                           |
|                                               |              |                |                     | 500    | 0                           | 0        | 0                           |
|                                               |              |                |                     | 1000   | 0                           | 0        | 0                           |
|                                               |              |                |                     | 5000   | 0                           | 429332   | 2388024                     |
| <b>Port area<sup>1</sup></b>                  | PORT_        | m <sup>2</sup> | +                   | 100    | 0                           | 2648     | 2516                        |
|                                               |              |                |                     | 300    | 0                           | 22447    | 85979                       |
|                                               |              |                |                     | 500    | 0                           | 59770    | 258949                      |
|                                               |              |                |                     | 1000   | 0                           | 226393   | 956817                      |
|                                               |              |                |                     | 5000   | 0                           | 6167718  | 13267782                    |
| <b>Residential land area<sup>1</sup></b>      | RES_         | m <sup>2</sup> | +                   | 100    | 0                           | 21152    | 31416                       |
|                                               |              |                |                     | 300    | 0                           | 183950   | 282742                      |
|                                               |              |                |                     | 500    | 0                           | 492795   | 785396                      |
|                                               |              |                |                     | 1000   | 104805                      | 1826998  | 3040804                     |
|                                               |              |                |                     | 5000   | 17043122                    | 32157817 | 46811645                    |
| <b>Transportation area<sup>1</sup></b>        | TRANS_       | m <sup>2</sup> | +                   | 100    | 0                           | 0        | 0                           |
|                                               |              |                |                     | 300    | 0                           | 0        | 0                           |
|                                               |              |                |                     | 500    | 0                           | 13457    | 2874                        |
|                                               |              |                |                     | 1000   | 0                           | 50061    | 233924                      |
|                                               |              |                |                     | 5000   | 519010                      | 1340506  | 2093995                     |
| <b>Urban Green area<sup>1</sup></b>           | URBG_        | m <sup>2</sup> | -                   | 100    | 0                           | 2351     | 7952                        |
|                                               |              |                |                     | 300    | 0                           | 25250    | 102385                      |
|                                               |              |                |                     | 500    | 0                           | 79234    | 268822                      |
|                                               |              |                |                     | 1000   | 0                           | 361378   | 852803                      |
|                                               |              |                |                     | 5000   | 6248972                     | 9362179  | 13883066                    |
| <b>Water<sup>1</sup></b>                      | WATER_       | m <sup>2</sup> |                     | 100    | 0                           | 0        | 0                           |
|                                               |              |                |                     | 300    | 0                           | 10238    | 30716                       |
|                                               |              |                |                     | 500    | 0                           | 37897    | 152537                      |
|                                               |              |                |                     | 1000   | 0                           | 222478   | 741893                      |
|                                               |              |                |                     | 5000   | 2904140                     | 8362718  | 12310634                    |

|                                                                                                                                 |            |             |   |      |          |           |           |
|---------------------------------------------------------------------------------------------------------------------------------|------------|-------------|---|------|----------|-----------|-----------|
| <b>Population density<sup>2</sup></b>                                                                                           | POP_       | n           | + | 100  | 0        | 319       | 770       |
|                                                                                                                                 |            |             |   | 300  | 0        | 2385      | 5355      |
|                                                                                                                                 |            |             |   | 500  | 25       | 6091      | 13410     |
|                                                                                                                                 |            |             |   | 1000 | 1485     | 21762     | 46115     |
|                                                                                                                                 |            |             |   | 5000 | 146514   | 366674    | 580006    |
| <b>Traffic intensity on nearest road<sup>3</sup></b>                                                                            | TRAFNEAR   | Veh/day     | + | 137  | 9986     | 22487     |           |
| <b>Traffic intensity on nearest major road<sup>3</sup></b>                                                                      | TRAFMAJOR  | Veh/day     | + | 3115 | 14212    | 28042     |           |
| <b>Heavy-duty traffic intensity on nearest road<sup>3</sup></b>                                                                 | HTRAFNEAR  | Veh/day     | + | 0    | 619      | 1333      |           |
| <b>Heavy-duty traffic intensity on nearest major road<sup>3</sup></b>                                                           | HTRAFMAJOR | Veh/day     | + | 54   | 980      | 2138      |           |
| <b>Road length of all roads<sup>3</sup></b>                                                                                     | RDL_       | m           | + | 25   | 39       | 66        | 100       |
|                                                                                                                                 |            |             |   | 50   | 100      | 187       | 294       |
|                                                                                                                                 |            |             |   | 100  | 254      | 636       | 966       |
|                                                                                                                                 |            |             |   | 300  | 2029     | 4880      | 7083      |
|                                                                                                                                 |            |             |   | 500  | 7893     | 13761     | 19090     |
|                                                                                                                                 |            |             |   | 1000 | 29092    | 50344     | 68095     |
| <b>Road length of all major roads<sup>3</sup></b>                                                                               | MRDL_      | m           | + | 25   | 0        | 24        | 91        |
|                                                                                                                                 |            |             |   | 50   | 0        | 69        | 198       |
|                                                                                                                                 |            |             |   | 100  | 0        | 210       | 534       |
|                                                                                                                                 |            |             |   | 300  | 0        | 1532      | 3554      |
|                                                                                                                                 |            |             |   | 500  | 0        | 3787      | 8800      |
|                                                                                                                                 |            |             |   | 1000 | 3015     | 13627     | 31882     |
| <b>Traffic intensity on all roads (sum of (traffic intensity * length of all segments))<sup>3</sup></b>                         | TLOA_      | (Veh/day)*m | + | 25   | 0        | 634722    | 1579945   |
|                                                                                                                                 |            |             |   | 50   | 6393     | 1815133   | 4797110   |
|                                                                                                                                 |            |             |   | 100  | 78159    | 5494027   | 14290643  |
|                                                                                                                                 |            |             |   | 300  | 3038453  | 36918277  | 1.01E+08  |
|                                                                                                                                 |            |             |   | 500  | 13741938 | 44180744  | 87625101  |
|                                                                                                                                 |            |             |   | 1000 | 62971674 | 166892417 | 324383228 |
| <b>Traffic intensity on all major roads (sum of (traffic intensity * length of all segments))<sup>3</sup></b>                   | TMLOA_     | (Veh/day)*m | + | 25   | 0        | 543194    | 1387293   |
|                                                                                                                                 |            |             |   | 50   | 0        | 1548534   | 4473085   |
|                                                                                                                                 |            |             |   | 100  | 0        | 4550786   | 13415227  |
|                                                                                                                                 |            |             |   | 300  | 0        | 12783795  | 26453420  |
|                                                                                                                                 |            |             |   | 500  | 0        | 30877644  | 64537936  |
|                                                                                                                                 |            |             |   | 1000 | 26948221 | 116664854 | 238567679 |
| <b>Heavy-duty traffic intensity on all roads (sum of (heavy-duty traffic intensity * length of all segments))<sup>3</sup></b>   | HLOA_      | (Veh/day)*m | + | 25   | 0        | 40889     | 59383     |
|                                                                                                                                 |            |             |   | 50   | 0        | 115926    | 205867    |
|                                                                                                                                 |            |             |   | 100  | 1607     | 336918    | 909792    |
|                                                                                                                                 |            |             |   | 300  | 84212    | 2085219   | 8507687   |
|                                                                                                                                 |            |             |   | 500  | 387896   | 2664654   | 6027990   |
|                                                                                                                                 |            |             |   | 1000 | 2550331  | 10515869  | 25699398  |
| <b>Heavy-duty traffic intensity on major roads (sum of (heavy-duty traffic intensity * length of all segments))<sup>3</sup></b> | HMLOA_     | (Veh/day)*m | + | 25   | 0        | 35363     | 41295     |
|                                                                                                                                 |            |             |   | 50   | 0        | 100488    | 141074    |
|                                                                                                                                 |            |             |   | 100  | 0        | 286355    | 742416    |
|                                                                                                                                 |            |             |   | 300  | 0        | 846066    | 1614863   |
|                                                                                                                                 |            |             |   | 500  | 0        | 2033997   | 4769469   |
|                                                                                                                                 |            |             |   | 1000 | 966747   | 8018542   | 22978460  |

47 <sup>1</sup>Source: CORINE (Copernicus Land Monitoring Service) 2018, raster 100m.

48 <sup>2</sup>Source: CBS (Central Bureau of Statistics Netherlands) 2017, 100m\*100m.

49 <sup>3</sup>Source: NWB (National Road Network Netherlands) 2011, vehicles per day per segment (between intersections)

51 **Table S2: Statistics of UFP model predictions in particle/cm<sup>3</sup>.**

| Model names        | <i>Min.</i> | <i>1<sup>st</sup> Qu.</i> | <i>Median</i> | <i>Mean</i> | <i>3<sup>rd</sup> Qu.</i> | <i>Max</i> |
|--------------------|-------------|---------------------------|---------------|-------------|---------------------------|------------|
| Mixed-effect model | 16,200      | 19,200                    | 20,000        | 22,175      | 21,800                    | 70,200     |
| AMS_SLR_160D       | 15,444      | 21,722                    | 23,587        | 25,588      | 26,810                    | 70,903     |
| CPH2AMS_SLR        | -1,543      | 5,723                     | 9,796         | 16,941      | 17,556                    | 191,372    |
| RTM2AMS_SLR        | 7,123       | 16,164                    | 19,701        | 23,151      | 26,785                    | 79,853     |
| IDW_SLR            | 7,642       | 15,353                    | 18,886        | 22,629      | 26,161                    | 88,468     |
| CPH2AMS_Coral      | 5,249       | 10,410                    | 11,100        | 11,832      | 12,397                    | 36,805     |
| RTM2AMS_Coral      | 2.42        | 22,043                    | 24,218        | 24,865      | 27,394                    | 52,094     |
| IDW_Coral          | 1.01        | 21,102                    | 23,102        | 23,762      | 26,014                    | 49,497     |

52

53 **Table S3: SLR trained in Rotterdam**

|                                                                 | <i>Estimate</i> | <i>Std. Error</i> | <i>t value</i> | <i>Pr(&gt; t )</i> |     |
|-----------------------------------------------------------------|-----------------|-------------------|----------------|--------------------|-----|
| <b>(Intercept)</b>                                              | 7.598e+00       | 1.297e-01         | 58.558         | <2e-16             | *** |
| <b>PORT_5000</b>                                                | 6.990e-08       | 8.808e-09         | 7.936          | 2.13e-15           | *** |
| <b>PORT_1000</b>                                                | 1.603e-06       | 9.488e-08         | 16.890         | <2e-16             | *** |
| <b>MRDL_100</b>                                                 | 1.879e-03       | 1.149e-04         | 16.348         | <2e-16             | *** |
| <b>WATER_500</b>                                                | 7.356e-08       | 4.736e-09         | 15.532         | <2e-16             | *** |
| <b>0</b>                                                        |                 |                   |                |                    |     |
| <b>RES_5000</b>                                                 | 4.877e-08       | 3.356e-09         | 14.532         | <2e-16             | *** |
| <b>INDUS_5000</b>                                               | 1.398e-07       | 1.567e-08         | 8.917          | <2e-16             | *** |
| <b>NATUR_500</b>                                                | 3.064e-08       | 1.551e-08         | 1.975          | 0.0483             | *   |
| <b>0</b>                                                        |                 |                   |                |                    |     |
| <b>TRANS_1000</b>                                               | 1.419e-06       | 1.864e-07         | 7.612          | 2.74e-14           | *** |
| <b>AGRI_100</b>                                                 | 3.803e-05       | 3.039e-06         | 12.515         | <2e-16             | *** |
| <b>INDUS_500</b>                                                | 1.289e-06       | 2.381e-07         | 5.412          | 6.25e-08           | *** |
| <b>WATER_500</b>                                                | 1.574e-06       | 3.617e-07         | 4.353          | 1.34e-05           | *** |
| <b>URBG_100</b>                                                 | 5.097e-06       | 4.652e-06         | 1.096          | 0.2732             |     |
| <b>TRAFNEAR</b>                                                 | 4.782e-05       | 1.716e-06         | 27.866         | <2e-16             | *** |
| <b>Multiple R-squared: 0.08009, Adjusted R-squared: 0.07988</b> |                 |                   |                |                    |     |

54 Signif. codes: 0 '\*\*\*' 0.001 '\*\*' 0.01 '\*' 0.05 '.' 0.1 ' ' 1

55

56 **Table S4: SLR trained in Copenhagen**

|                    | <i>Estimate</i> | <i>Std. Error</i> | <i>t value</i> | <i>Pr(&gt; t )</i> |     |
|--------------------|-----------------|-------------------|----------------|--------------------|-----|
| <b>(Intercept)</b> | -1.844e-01      | 5.297e-01         | -0.348         | 0.727717           |     |
| <b>TRANS_5000</b>  | 1.994e-06       | 1.158e-07         | 17.223         | <2e-16             | *** |
| <b>PORT_300</b>    | 2.572e-05       | 1.483e-06         | 17.343         | <2e-16             | *** |
| <b>WATER_100</b>   | 7.235e-06       | 4.429e-07         | 16.335         | <2e-16             | *** |
| <b>0</b>           |                 |                   |                |                    |     |
| <b>POP_100</b>     | 3.360e-03       | 5.600e-04         | 5.999          | 2.03e-09           | *** |
| <b>TRANS_1000</b>  | 4.101e-06       | 4.246e-07         | 9.659          | <2e-16             | *** |
| <b>TRAFNEAR</b>    | 3.209e-04       | 9.890e-06         | 32.444         | <2e-16             | *** |
| <b>INDUS_5000</b>  | 1.525e-07       | 3.481e-08         | 4.381          | 1.19e-05           | *** |

|                                                               |            |           |        |          |     |
|---------------------------------------------------------------|------------|-----------|--------|----------|-----|
| <b>NATUR_5000</b>                                             | -8.172e-09 | 1.574e-08 | -0.519 | 0.603678 |     |
| <b>RDL_500</b>                                                | 2.094e-04  | 3.433e-05 | 6.100  | 1.09e-09 | *** |
| <b>AGRI_300</b>                                               | 7.796e-06  | 2.785e-06 | 2.799  | 0.005138 | **  |
| <b>MRDL_300</b>                                               | 4.554e-04  | 1.349e-04 | 3.376  | 0.000737 | *** |
| <b>AIR_5000</b>                                               | 1.051e-07  | 3.976e-08 | 2.643  | 0.008239 | **  |
| <b>URBG_1000</b>                                              | 1.409e-06  | 2.052e-07 | 6.867  | 6.86e-12 | *** |
| <b>MRDL_50</b>                                                | 2.475e-02  | 1.240e-03 | 19.956 | <2e-16   | *** |
| <b>Multiple R-squared: 0.3461, Adjusted R-squared: 0.3454</b> |            |           |        |          |     |

57 Signif. codes: 0 '\*\*\*' 0.001 '\*\*' 0.01 '\*' 0.05 '.' 0.1 ' ' 1

58

59 **Table S5: SLR trained in Amsterdam**

|                                                               | <i>Estimate</i> | <i>Std. Error</i> | <i>t value</i> | <i>Pr(&gt; t )</i> |     |
|---------------------------------------------------------------|-----------------|-------------------|----------------|--------------------|-----|
| <b>(Intercept)</b>                                            | 6.906e+00       | 2.244e-01         | 30.780         | <2e-16             | *** |
| <b>MRDL_100</b>                                               | 5.908e-03       | 1.533e-04         | 38.532         | <2e-16             | *** |
| <b>TRAFNEAR</b>                                               | 1.069e-04       | 1.425e-06         | 75.012         | <2e-16             | *** |
| <b>MRDL_25</b>                                                | 2.742e-02       | 9.877e-04         | 27.767         | <2e-16             | *** |
| <b>PORT_1000</b>                                              | 9.889e-07       | 5.961e-08         | 16.590         | <2e-16             | *** |
| <b>TRANS_5000</b>                                             | 1.048e-06       | 4.653e-08         | 22.523         | <2e-16             | *** |
| <b>TLOA_1000</b>                                              | 4.916e-09       | 1.363e-10         | 36.059         | <2e-16             | *** |
| <b>URBG_5000</b>                                              | -1.209e-08      | 1.207e-08         | -1.001         | 0.317              |     |
| <b>AGRI_300</b>                                               | 6.586e-06       | 6.140e-07         | 10.726         | <2e-16             | *** |
| <b>INDUS_5000</b>                                             | 1.552e-07       | 1.601e-08         | 9.693          | <2e-16             | *** |
| <b>WATER_1000</b>                                             | 1.404e-06       | 8.749e-08         | 16.048         | <2e-16             | *** |
| <b>POP_1000</b>                                               | 3.543e-05       | 1.848e-06         | 19.176         | <2e-16             | *** |
| <b>AIR_5000</b>                                               | -9.398e-08      | 1.349e-08         | -6.966         | 3.31e-12           | *** |
| <b>WATER_5000</b>                                             | -9.105e-08      | 7.067e-09         | -12.885        | <2e-16             | *** |
| <b>NATUR_5000</b>                                             | -6.473e-07      | 3.644e-08         | -17.765        | <2e-16             | *** |
| <b>Multiple R-squared: 0.4427, Adjusted R-squared: 0.4425</b> |                 |                   |                |                    |     |

60 Signif. codes: 0 '\*\*\*' 0.001 '\*\*' 0.01 '\*' 0.05 '.' 0.1 ' ' 1

61

62

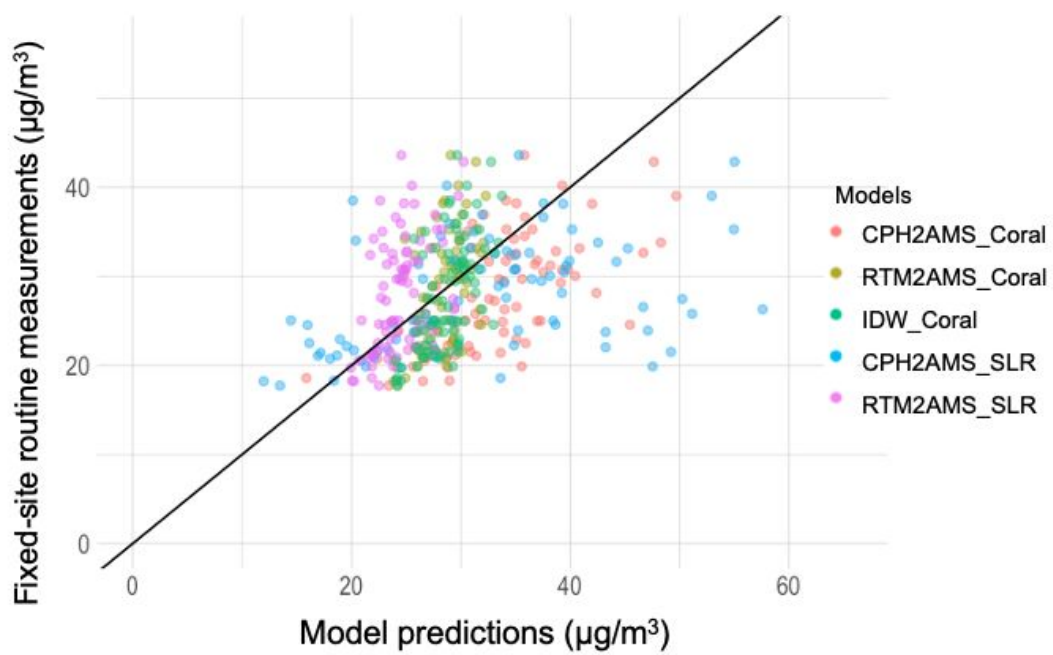

63

64 **Figure S1. Scatterplot of model predictions against fixed-site validation measurements (NO<sub>2</sub>;**  
65 **n=82).**

AMS\_SLR-IDW\_Coral

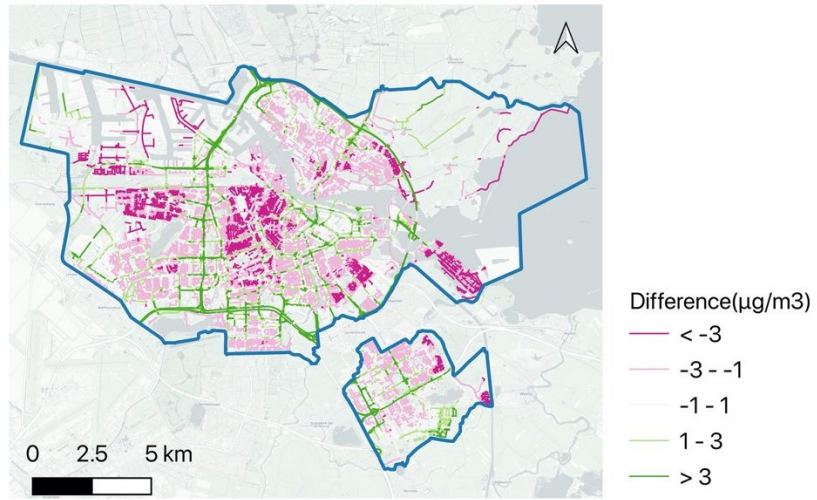

AMS\_SLR-CPH2AMS\_Coral

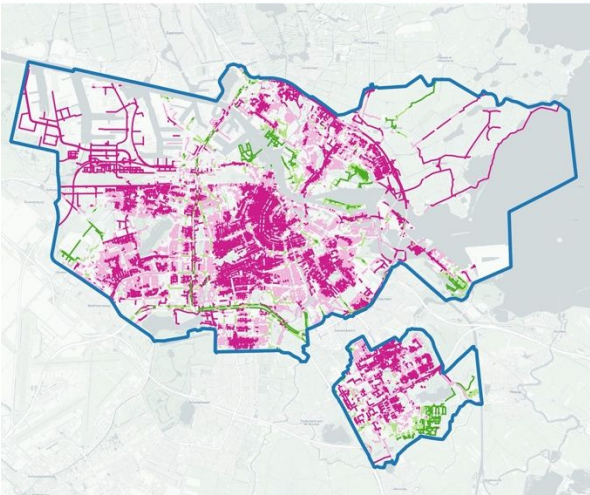

AMS\_SLR-RTM2AMS\_Coral

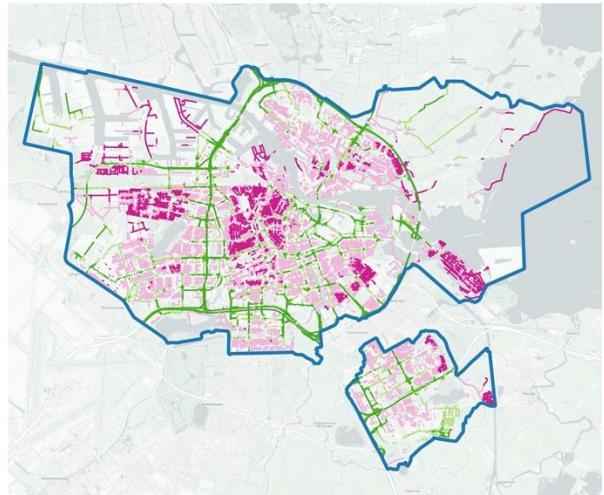

AMS\_SLR-CPH2AMS\_SLR

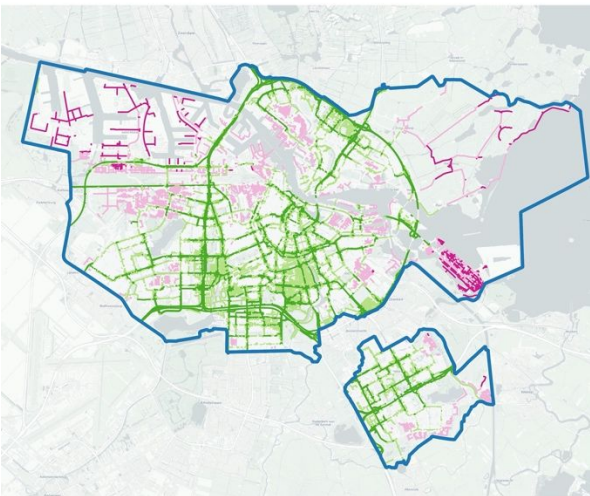

AMS\_SLR-RTM2AMS\_SLR

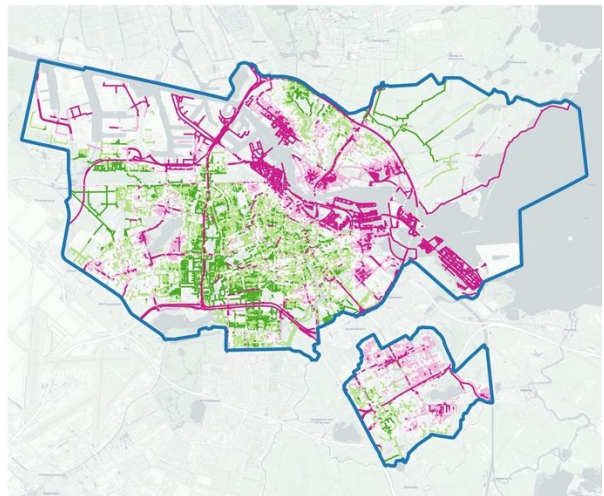

Figure S2. NO<sub>2</sub> maps of differences between SLR\_AMS\_160D and the other model tested.



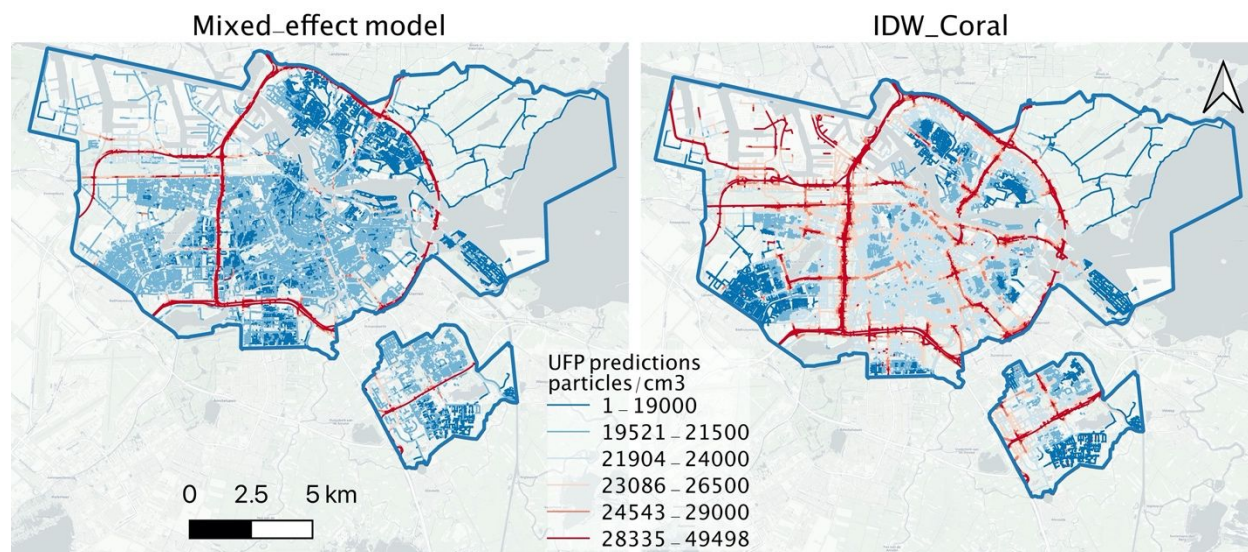

**Figure S3. Spatial maps of UFP predictions from the mixed-effect and IDW\_Coral models with a unified legend.**
